# Supplementary material for: A PCR-free screen-printed magnetic electrode for the detection of circular RNA from hepatocellular cancer based on a back-splice junction
Source: Royal Society of Chemistry journal article supplement (doi:10.1039/d1ra01033f), 2021-01-01
Supplement: d1ra01033f1.pdf [file d1ra01033f1.pdf]

## Electronic Supplementary Information:

### A PCR-Free Screen-Printed Magnetic Electrode for the Detection of Circular RNA from Hepatocellular Cancer Based on Back-Splice Junction

Bin Zhang <sup>a,b§</sup>, Yitao Liang <sup>a§</sup>, Liang Bo<sup>a</sup>, Mingyu Chen<sup>b</sup>, Bobo Huang<sup>a</sup>, Qingpeng Cao<sup>a</sup>, Jinwei Wei<sup>a</sup>,  
Tianyu Li<sup>a,b</sup>, Xiujun Cai <sup>b,c\*</sup>, and Xuesong Ye<sup>a,c\*</sup>

<sup>a</sup> Biosensor National Special Laboratory, Key Laboratory of Biomedical Engineering of Ministry of Education, College of Biomedical Engineering and Instrument Science, Innovation Center for Minimally Invasive Technique and Device, Zhejiang University, Zhejiang University, Hangzhou 310027, PR China

<sup>b</sup> Department of General Surgery, Sir Run Run Shaw Hospital, School of Medicine, Zhejiang University, 3 East Qingchun Road, Hangzhou 310016, China

<sup>c</sup> Zhejiang Research and Development Engineering Laboratory of Minimally Invasive Technology and Equipment, School of Medicine, Zhejiang University, 3 East Qingchun Road, Hangzhou 310016, China

\*Corresponding authors:

Xuesong Ye: [yexuesong@zju.edu.cn](mailto:yexuesong@zju.edu.cn); Tel: +86 571 87952756;

Xiujun Cai: [srrsh\\_cxj@zju.edu.cn](mailto:srrsh_cxj@zju.edu.cn); Tel: +86 571 86006617.

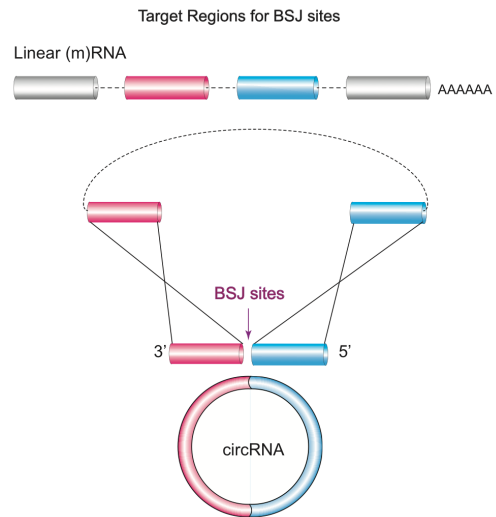

**Fig. S1.** Schematic illustration of Back-splice junction (BSJ) sites of circRNA. CircRNAs are produced by precursor mRNA back-splicing of exons of genes. BSJ sites of circRNA are considered to be a conserved motif.

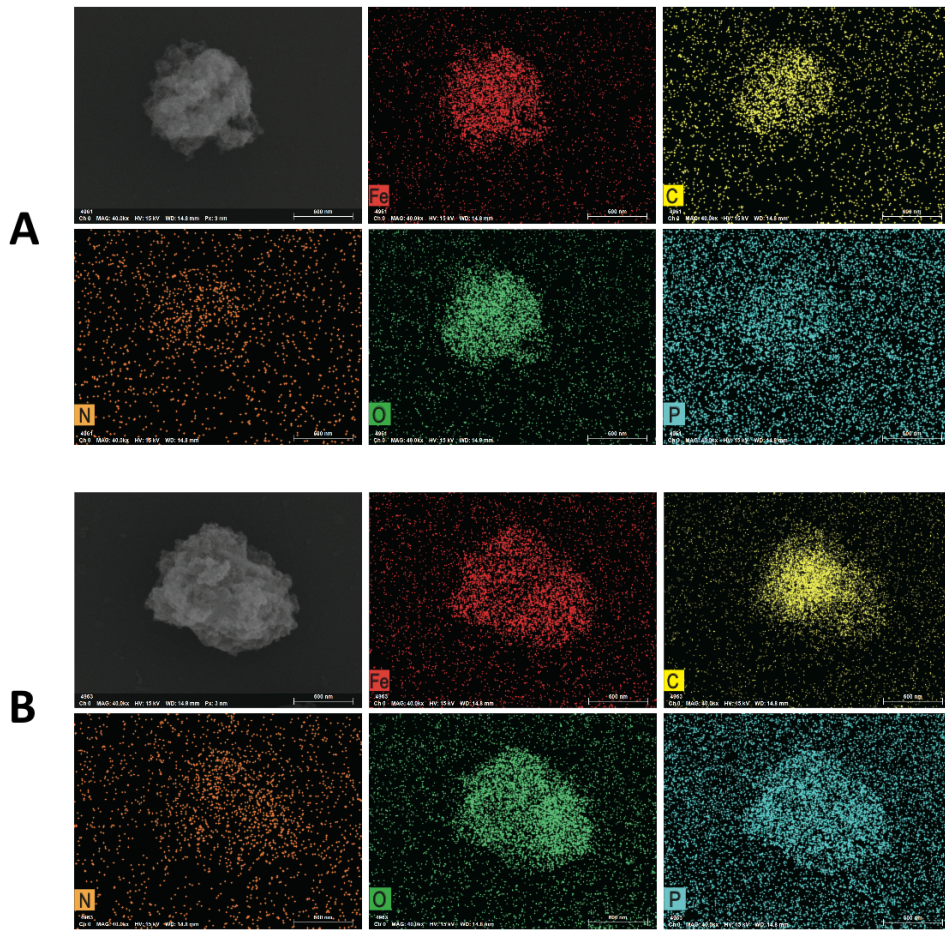

**Fig. S2.** EDS map of (A) streptavidin-coated magnetic beads. (B) biotin-probes conjunct streptavidin-coated magnetic beads.

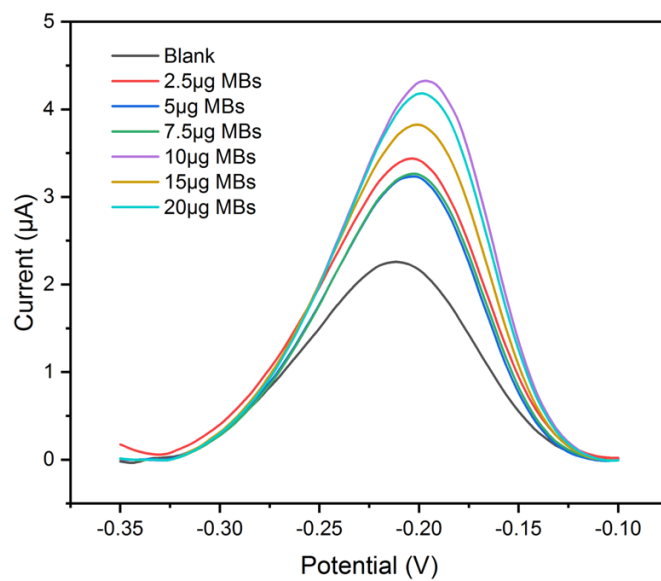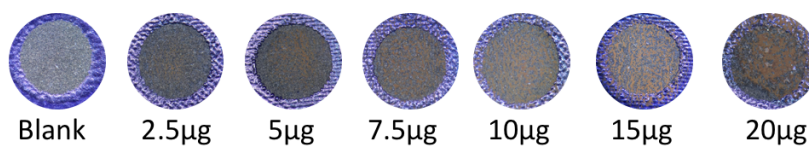

**Fig. S3.** Various amounts of suspension volume ranging from 0 to 20 μg MBs in electrochemical performance AND surface of the electrode.

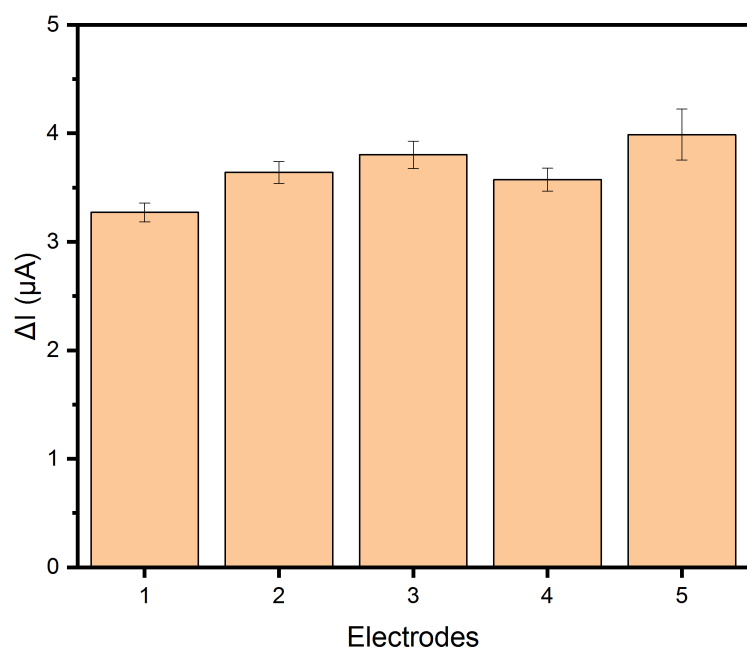

**Fig. S4.** The electrochemical DPV response of independently fabricated 5 biosensors in 10pM concentrations. Error bars represented the results of three measurements in the same electrode.

**Table S1. Oligonucleotides used in this work**

| Oligonucleotide                 | Sequence(5'→ 3')                                |
|---------------------------------|-------------------------------------------------|
| BSJ sequence of circCDYL (20bp) | 5'-UAACGGGAAAGGUUGAAAGG-3'                      |
| Captured probe of BSJ-circCDYL  | 5'-biotin-CCTTTCAACCTTTCCGTTA-3'                |
| circCDYL Synth                  | 5'-CUGUUAACGGGAAAGGUUGAAAGGAUUG-3'              |
| 3-base mutation circCDYL Synth  | 5'-CUGUUAACGGUAA <del>CGG</del> GUGAAAGGAUUG-3' |
| microRNA21                      | 5'-UAGCUUAUCAGACUGAUGUUGA-3'                    |

**Table S2. Comparison of different methods for circRNA analysis.**

| Method                     | Electrode            | Technique | Reverse Transcription | Any Nuclease Needed | RNase R Needed | Type of Probe | Limit of Detection | Linear Range | Time     | Ref          |
|----------------------------|----------------------|-----------|-----------------------|---------------------|----------------|---------------|--------------------|--------------|----------|--------------|
| Northern blot              |                      |           | Yes                   | Yes                 | Yes            |               |                    | ~10 nM       | >4H      | <sup>1</sup> |
| Real-time quantitative PCR |                      |           | Yes                   | Yes                 | Yes            |               | 100fM              |              | >4H      | <sup>2</sup> |
| Electrochemical            | Gold disk electrodes | SWV       | No                    | Yes, DSN            | No             | BSJ-DNA       | 3.47fM             | 10 fM-100 pM | About 2H | <sup>3</sup> |
| Electrochemical            | SPME                 | DPV       | No                    | No                  | No             | BSJ-DNA       | 1pM                | 1 pM-1 nM    | Less 3H  | this work    |

PCR: Polymerase Chain Reaction; SPME: Screen-Printed Magnetic Electrode; SWV: Square Wave Voltammetry; DPV: Differential Pulse Voltammetry; DSN: Duplex-Specific Nuclease; BSJ-DNA: Back-Splice Junction-DNA.

**Table S3 Determination of circRNA added in human serum**

| Serum sample | Add/pM | Found/pM | Recovery/% | RSD/% (n=3) |
|--------------|--------|----------|------------|-------------|
| 1            | 1      | 1.197    | 119.7      | 8.34        |
| 2            | 10     | 11.51    | 115.1      | 8.94        |



**Reference:**

1. A. D. Castaneda, N. J. Brenes, A. Kondajji and R. M. Crooks, *J Am Chem Soc*, 2017, **139**, 7657-7664.
2. B. C. Yin, Y. Q. Liu and B. C. Ye, *J Am Chem Soc*, 2012, **134**, 5064-5067.
3. J. Jiao, C. Li, L. Ning, L. Shi, L. Wang, Y. Xiang and G. Li, *Sensors and Actuators B: Chemical*, 2020, **302**.
